# Supplementary material for: Synthesis of D–A polymers with a disilanobithiophene donor and a pyridine or pyrazine acceptor and their applications to dye-sensitized solar cells
Source: Royal Society of Chemistry journal article supplement (doi:10.1039/c5ra01055a), 2015-01-01
Supplement: c5ra01055a1.pdf [file c5ra01055a1.pdf]

## **Synthesis of new D-A polymers with disilanobithiophene donor and pyridine or pyrazine acceptor and their applications to dye-sensitized solar cells**

Joji Ohshita,\* Yohei Adachi, Daiki Tanaka, Makoto Nakashima, Yousuke Ooyama

*Department of Applied Chemistry, Graduate School of Engineering, Hiroshima University, Higashi-Hiroshima 739-8527, Japan*

### **Supporting Information**

|                                                                |       |
|----------------------------------------------------------------|-------|
| Experimental procedures of monomer syntheses                   | p S-2 |
| NMR spectra of DSBT-containing polymers                        | pS-8  |
| Molecular weight-dependent UV-vis spectra of <b>pDSBTTPzT2</b> | pS-16 |

## Experimental

### *General*

All reactions were carried out in dry argon. For the reaction solvents, diethyl ether, THF, DMF, toluene, and chlorobenzene were purchased from Kanto Chemical Co. Ltd. and were distilled from calcium hydride and stored over activated molecular sieves before use, whereas dichloromethane was distilled from calcium hydride immediately before use. Chloroform and acetic acid that were used as the reaction solvents for bromination with NBS were also purchased from Kanto chemical Co. Ltd. and used as obtained. Bis(trimethylsilyl)dibromobithiophene<sup>1</sup> and 2,5-bis(5-bromo-2-thienyl)pyridine<sup>2</sup> were prepared according to the literature method. 1,2-Dichlorotetra(*n*-hexyl)disilane was prepared in a fashion similar to what reported for 1,2-dichlorotetra(*n*-butyl)disilane.<sup>3</sup> The <sup>1</sup>H and <sup>13</sup>C NMR data obtained for 1,2-dichlorotetra(*n*-hexyl)disilane were consistent with those in the literature.<sup>4</sup> NMR spectra were recorded on a Varian System 500 spectrometer. IR spectra were recorded on a Shimadzu IRAffinity-1 spectrometer. UV-Vis spectra were measured with a Hitachi U-2910 spectrometer. Molecular weight of the present polymers were determined by gel permeation chromatography (GPC) using THF as an eluent and serially connected Shodex KF2001 and KF2002 columns, relative to the polystyrene standards. TGA was carried out on a SII TG/DTA-6200 analyzer under a gentle nitrogen flow (30 mL/min) at a heating rate of 10 °C/min. Fabrication and evaluation of DSSCs were performed as reported in the literature.<sup>4d</sup> Usual workup for monomeric compounds mentioned below includes hydrolysis of the reaction mixture with water and separation of the organic layer. The aqueous layer was extracted with chloroform. The organic layer and the extract were combined and washed with water. After drying over anhydrous magnesium sulfate, the solvent was evaporated.

### *Synthesis of DSBTSi*

To a solution of 3.21 g (6.85 mmol) of 5,5'-bis(trimethylsilyl)-3,3'-dibromobithiophene in 70 mL of THF was added slowly 8.7 mL (13.7 mol) of a 1.58 M of *n*-butyllithium solution in hexane at -78°C over a period of 60 min. To this was added 3.25 g (6.95 mmol) of 1,2-dichlorotetra(*n*-hexyl)disilane at this temperature and the resulting mixture was stirred at room temperature overnight. After usual workup, the residue was subjected to silica gel column chromatography with hexane as an eluent to provide 3.45 g (4.89 mmol, 71% yield) of **DSBTSi** as a yellow oil. EI-MS:  $m/z = 704$  [ $M^+$ ].  $^1\text{H}$  NMR (in  $\text{CDCl}_3$ ):  $\delta = 0.32$  (18H, s,  $\text{CH}_3\text{Si}$ ), 0.76-0.93 (20H, m, *n*Hex), 1.16-1.37 (32H, m, *n*Hex), 7.12 (2H, s, thiophene).  $^{13}\text{C}$  NMR (in  $\text{CDCl}_3$ ):  $\delta = 0.04, 12.90, 14.11, 22.56, 24.83, 31.45, 33.30, 133.85, 138.05, 140.30, 150.92$ .  $^{29}\text{Si}$  NMR (in  $\text{CDCl}_3$ ):  $\delta = -6.90, -28.01$ . Anal. Calcd for  $\text{C}_{38}\text{H}_{72}\text{S}_2\text{Si}_4$ : C, 64.70; H, 10.29. Found: C, 64.70; H, 10.52.

#### *Synthesis of DSBTBr*

To a solution of 1.11 g (1.57 mmol) of **DSBTSi** in 15 mL of dichloromethane was added 559 mg (3.14 mmol) of NBS in several portions and the mixture was stirred at room temperature for 3 h. After usual workup, the residue was subjected to silica gel column chromatography eluting with hexane to provide 0.983 g (1.37 mmol, 87% yield) of **DSBTBr** as a yellow oil. EI-MS:  $m/z = 716$  [ $M^+$  for  $^{79}\text{Br}$ ].  $^1\text{H}$  NMR (in  $\text{CDCl}_3$ ):  $\delta = 0.72$ -0.92 (20H, m, *n*Hex), 1.14-1.34 (32H, m, *n*Hex), 6.94 (2H, s, thiophene).  $^{13}\text{C}$  NMR (in  $\text{CDCl}_3$ ):  $\delta = 12.65, 14.09, 22.58, 24.72, 31.39, 33.27, 110.10, 134.71, 135.62, 145.92$ .  $^{29}\text{Si}$  NMR (in  $\text{CDCl}_3$ ):  $\delta = -27.80$ . Anal. Calcd for  $\text{C}_{32}\text{H}_{54}\text{Br}_2\text{S}_2\text{Si}_2$ : C, 53.47; H, 7.57. Found: C, 53.69; H, 7.58.

#### *Synthesis of DSBTBrSn and DSBTSn*

To a solution of **DSBTBr** (691 mg, 0.962 mmol) in 15 mL of diethyl ether was added 0.61 mL of a 1.58 M *n*-butyllithium in hexane at -78°C over a period of 60 min. To this was added 212 mg (1.06 mmol) of trimethyltin chloride at this temperature and the

mixture was stirred at room temperature overnight. After usual workup, the residue was subjected to preparative GPC eluting with toluene to give 357 mg (0.445 mmol, 46% yield) of **DSBTBrSn** as a colorless oil. EI-MS:  $m/z = 802 [M^+]$ .  $^1\text{H}$  NMR (in  $\text{CDCl}_3$ ):  $\delta = 0.39$  (9H, s,  $\text{CH}_3\text{Sn}$ ), 0.77-0.94 (20H, m,  $n\text{Hex}$ ), 1.19-1.37 (32H, m,  $n\text{Hex}$ ), 6.95 (1H, s, thiophene), 7.07 (1H, s, thiophene).  $^{13}\text{C}$  NMR (in  $\text{CDCl}_3$ ):  $\delta = -8.10$ , 12.82, 12.86, 14.09 (2C), 22.57, 22.58, 24.77, 24.83, 31.43 (2C), 33.29, 33.32, 109.47, 133.60, 133.96, 135.53, 136.08, 141.29, 147.61, 150.15 (two  $\text{sp}^3$  carbon signals may be overlapped with other signals).  $^{29}\text{Si}$  NMR (in  $\text{CDCl}_3$ ):  $\delta = -28.02$ ,  $-27.74$ . Anal. Calcd for  $\text{C}_{35}\text{H}_{63}\text{BrS}_2\text{Si}_2\text{Sn}$ : C, 52.37; H, 7.91. Found: C, 52.64; H, 8.03.

**DSBTSn** was prepared in a fashion similar to that above. Thus, treatment of **DSBTBr** with 2 equiv of  $n\text{-BuLi}$  then 2 equiv of trimethyltin chloride, followed by usual workup and purification of the residue by GPC gave **DSBTSn** (64% yield) as a colorless oil. EI-MS  $m/z = 886 [M^+ \text{ for } ^{79}\text{Br}]$ .  $^1\text{H}$  NMR (in  $\text{CDCl}_3$ ):  $\delta = 0.37$  (18H, s,  $\text{MeSn}$ ) 0.76-0.94 (20H, m,  $n\text{Hex}$ ), 1.15-1.38 (32H, m,  $n\text{Hex}$ ), 7.08 (2H, s, thiophene).  $^{13}\text{C}$  NMR (in  $\text{CDCl}_3$ ):  $\delta = -8.12$ , 12.98, 14.11, 22.58, 24.86, 31.46, 33.33, 132.96, 135.26, 141.30, 151.61.  $^{29}\text{Si}$  NMR (in  $\text{CDCl}_3$ ):  $\delta = -26.87$ . Anal. Calcd for  $\text{C}_{38}\text{H}_{72}\text{S}_2\text{Si}_2\text{Sn}_2$ : C, 51.47; H, 8.18. Found: C, 51.70; H, 8.24.

#### *Synthesis of **DSOBTBr***

From a 30 mL toluene solution of 440 mg (3.95 mmol) of trimethylamine N-oxide dihydrate ca. 10 mL of toluene was distilled to dry the solution azeotropically. To this was added 946 mg (1.32 mmol) of **DSBTBr** at room temperature and the mixture was heated to reflux for 2 h. After usual workup, the residue was subjected to silica gel column chromatography eluting with hexane to provide 858 mg (89% yield) of **DSOBTBr** as a yellow oil. EI-MS:  $m/z = 734 [M^+]$ .  $^1\text{H}$  NMR (in  $\text{CDCl}_3$ ):  $\delta = 0.64$ -0.73 (8H, m,  $n\text{Hex}$ ), 0.86 (12H, t,  $J = 7.2$  Hz,  $\text{CH}_3$ ), 1.15-1.34 (32H, m,  $n\text{Hex}$ ), 6.94 (2H, s, thiophene).  $^{13}\text{C}$  NMR (in  $\text{CDCl}_3$ ):  $\delta = 14.13$ , 15.46, 22.53, 22.75, 31.47, 32.88, 112.33, 135.88, 139.59, 146.11.  $^{29}\text{Si}$  NMR (in  $\text{CDCl}_3$ ):  $\delta = -1.48$ . Anal. Calcd

for C<sub>32</sub>H<sub>54</sub>Br<sub>2</sub>OS<sub>2</sub>Si<sub>2</sub>: C, 52.30; H, 7.41. Found: C, 52.54; H, 7.45.

#### *Synthesis of DSOBTBrSn*

Bromostannylsiloxane **DSOBTBrSn** was prepared from **DSOBTBr** in a fashion similar to that of **DSBTBrSn** in 56% yield as a yellow oil. EI-MS:  $m/z = 818 [M^+]$ . <sup>1</sup>H NMR (in CDCl<sub>3</sub>):  $\delta = 0.39$  (9H, s, CH<sub>3</sub>Sn), 0.62-0.76 (8H, m, *n*Hex), 0.82-0.90 (12H, m, *n*Hex), 1.13-1.33 (32H, m, *n*Hex), 6.93 (1H, s, thiophene), 7.05 (1H, s, thiophene). <sup>13</sup>C NMR (in CDCl<sub>3</sub>):  $\delta = -8.10, 14.13, 14.15, 15.67, 15.74, 22.53$  (2C), 22.77, 22.86, 31.49, 31.51, 32.91, 32.93, 111.35, 135.66, 138.15, 138.58, 138.95, 141.36, 147.86, 150.46. <sup>29</sup>Si NMR (in CDCl<sub>3</sub>):  $\delta = -1.88, -0.64$ . Anal. Calcd for C<sub>35</sub>H<sub>63</sub>BrOS<sub>2</sub>Si<sub>2</sub>Sn: C, 51.34; H, 7.76. Found: C, 51.38; H, 7.90.

#### *Synthesis of 2-(tributylstannyl)-4-(n-hexyl)thiophene and 2-(trimethylstannyl)-3-(n-hexyl)thiophene*

The title compounds were prepared in a fashion similar to what reported for 2-tributylstannyl-4-(*i*-butyl)thiophene [5] and 2-trimethylstannyl-3-(*n*-decyl or dodecyl)thiophene [6], respectively. Data for 2-tributylstannyl-4-(*n*-hexyl)thiophene. EI-MS:  $m/z = 401 [M^+ - Bu]$ . <sup>1</sup>H NMR (in CDCl<sub>3</sub>):  $\delta = 0.82-1.70$  (38H, m, *n*Bu, *n*Hex), 2.64 (2H, t,  $J = 7.6$  Hz, CH<sub>2</sub> on thiophene), 6.96 (1H, s, thiophene), 7.18 (1H, s, thiophene). Data for 2-(trimethylstannyl)-3-(*n*-hexyl)thiophene. EI-MS:  $m/z = 317 [M^+ - Me]$ . <sup>1</sup>H NMR (in CDCl<sub>3</sub>):  $\delta = 0.37$  (9H, m, CH<sub>3</sub> on Sn), 0.89 (3H, t,  $J = 6.8$  Hz, CH<sub>3</sub>), 1.25-1.40 (6H, m, *n*Hex), 1.52-1.63 (2H, m, *n*Hex), 2.62 (2H, t,  $J = 8.0$  Hz, CH<sub>2</sub> on thiophene), 7.09 (1H, d,  $J = 4.4$  Hz, thiophene), 7.53 (1H, d,  $J = 4.8$  Hz, thiophene).

#### *Synthesis of TPzT1 and TPzT2*

A mixture of 1.12 g (4.72 mmol) of 2,5-dibromopyrazne, 7.2 g (purity 60% based on the <sup>1</sup>H NMR spectrum, 9.45 mmol) of 2-tributylstannyl-4-*n*-hexylthiophene, 167 mg

(5mol%) of PdCl<sub>2</sub>(PPh<sub>3</sub>)<sub>2</sub>, and 65 mL of DMF was heated at 85 °C for 3 days. After usual workup, the residue was subjected to silica gel column chromatography with chloroform as an eluent, followed by recrystallization from ethanol/toluene to give 1.53 g (79% yield) of **TPzT1** as a yellow plate crystal. Mp 96.9-100.6 °C. EI-MS:  $m/z = 412$  [M<sup>+</sup>]. <sup>1</sup>H NMR (in CDCl<sub>3</sub>): δ = 0.89 (6H, t,  $J = 7.2$  Hz, CH<sub>3</sub>), 1.28-1.40 (12H, m, CH<sub>2</sub>), 1.66 (4H, quint,  $J = 7.4$  Hz, CH<sub>2</sub>), 2.65 (4H, t,  $J = 7.2$  Hz, CH<sub>2</sub> on thiophene), 7.08 (2H, d,  $J = 1.2$  Hz, thiophene), 7.55 (2H, d,  $J = 1.2$  Hz, thiophene), 8.83 (2H, s, pyrazine). <sup>13</sup>C NMR (in CDCl<sub>3</sub>): δ = 14.10, 22.61, 28.95, 30.40, 31.52, 31.65, 123.57, 126.77, 139.26, 140.62, 144.92, 145.84. Anal. Calcd for C<sub>24</sub>H<sub>32</sub>N<sub>2</sub>S<sub>2</sub>: C, 69.86; H, 7.82; N, 6.79. Found: C, 69.86; H, 7.77; N, 6.77.

**TPzT2** was prepared as a light yellow powder in 46% yield in a fashion similar to that above, by heating a mixture of 2,5-dibromopyrazne and 2-trimethylstannyl-3-*n*-hexylthiophene in toluene with Pd<sub>2</sub>(dba)<sub>3</sub> (3 mol%)/P(*o*-tol)<sub>3</sub> (12 mol%) as the catalyst at 100 °C for 3 days. Mp 69.9-71.0 °C. EI-MS:  $m/z = 412$  [M<sup>+</sup>]. <sup>1</sup>H NMR (in CDCl<sub>3</sub>): δ = 0.88 (6H, t,  $J = 6.8$  Hz, CH<sub>3</sub>), 1.26-1.45 (12H, m, CH<sub>2</sub>), 1.70 (4H, quint,  $J = 7.6$  Hz, CH<sub>2</sub>), 2.93 (4H, t,  $J = 7.6$  Hz, CH<sub>2</sub> on thiophene), 7.03 (2H, d,  $J = 5.2$  Hz, thiophene), 7.38 (2H, d,  $J = 5.2$  Hz, thiophene), 8.82 (2H, s, pyrazine). <sup>13</sup>C NMR (in CDCl<sub>3</sub>): δ = 14.07, 22.59, 29.26, 29.88, 30.54, 31.65, 127.02, 131.06, 134.48, 141.39, 142.29, 146.37.

#### *Synthesis of TPzT1Br and TPzT2Br*

To a solution of 301 mg (0.73 mmol) of **TPzT1** in a mixed solvent of 8 mL of acetic acid and 12 mL of chloroform was added 264 mg (1.48 mmol) of NBS in several portions. After usual workup, the residue was subjected to silica gel column chromatography with chloroform as the eluent to give 338 mg (0.59 mmol, 81% yield) of **TPzT1Br** as a yellow needle crystal. Mp 118.2-123.0 °C. EI-MS:  $m/z = 568$  [M<sup>+</sup> for <sup>79</sup>Br]. <sup>1</sup>H NMR (in CDCl<sub>3</sub>): δ = 0.90 (6H, t,  $J = 7.2$  Hz, CH<sub>3</sub>), 1.27-1.42 (12H, m,

CH<sub>2</sub>), 1.63 (4H, quint,  $J = 7.6$  Hz, CH<sub>2</sub>), 2.59 (4H, t,  $J = 7.6$  Hz, CH<sub>2</sub> on thiophene), 7.35 (2H, s, thiophene), 8.73 (2H, s, pyrazine). <sup>13</sup>C NMR (in CDCl<sub>3</sub>):  $\delta = 14.09, 22.58, 28.88, 29.64, 29.68, 31.59, 113.37, 126.02, 138.78, 140.52, 143.80, 145.28$ . Anal. Calcd for C<sub>24</sub>H<sub>30</sub>Br<sub>2</sub>N<sub>2</sub>S<sub>2</sub>: C, 50.53; H, 5.30; N, 4.91. Found: C, 50.58; H, 5.10; N, 4.89

**TPzT2Br** was prepared in a fashion similar to that above and purified by GPC with chloroform as the eluent, followed by recrystallization from ethanol as an orange needle crystal in 43% yield. Mp 98.5-104.8 °C. EI-MS:  $m/z = 568$  [M<sup>+</sup> for <sup>79</sup>Br]. <sup>1</sup>H NMR (in CDCl<sub>3</sub>):  $\delta = 0.89$  (6H, t,  $J = 7.2$  Hz, CH<sub>3</sub>), 1.26-1.44 (12H, m, CH<sub>2</sub>), 1.67 (4H, quint,  $J = 7.6$  Hz, CH<sub>2</sub>), 2.86 (4H, t,  $J = 7.6$  Hz, CH<sub>2</sub> on thiophene), 6.97 (2H, s, thiophene), 8.71 (2H, s, pyrazine). <sup>13</sup>C NMR (in CDCl<sub>3</sub>):  $\delta = 14.06, 22.55, 29.17, 29.98, 30.27, 31.59, 115.10, 133.79, 136.30, 140.78, 142.84, 145.57$ . Anal. Calcd for C<sub>24</sub>H<sub>30</sub>Br<sub>2</sub>N<sub>2</sub>S<sub>2</sub>: C, 50.53; H, 5.30; N, 4.91; S, 11.24. Found: C, 50.77; H, 5.34; N, 4.87; S, 11.52.

## References

- [1] J. Ohshita, M. Nodono, H. Kai, T. Watanabe, A. Kunai, K. Komaguchi, M. Shiotani, A. Adachi, K. Okita, Y. Harima, K. Yamashita, M. Ishikawa, *Organometallics*, **1999**, *18*, 1453.
- [2] M. S. Khan, M. R. A. Al-Mandhary, M. K. Al-Suti, N. Feeder, S. Nahar, A. Köhler, R. H. Friend, P. J. Wilson, P. R. J. Raithby, *J. Chem. Soc., Dalton Trans.*, **2002**, 2441.
- [3] M. Ishikawa, T. Horio, T. Hatano, A. Kunai, *Organometallics*, **1993**, *12*, 2078.
- [4] Y. Morisaki, F. Fujimura, Y. Chujo, *Organometallics*, **2003**, *22*, 3553.
- [5] D. Bong, I. Tam, R. Breslow, *J. Am. Chem. Soc.*, **2004**, *126*, 11796.
- [6] X. Guo, R. P. Ortiz, Y. Zheng, Y. Hu, Y.-Y. Noh, K.-J. Baeg, A. Facchetti, T. J. Marks, *J. Am. Chem. Soc.*, **2011**, *133*, 1405.

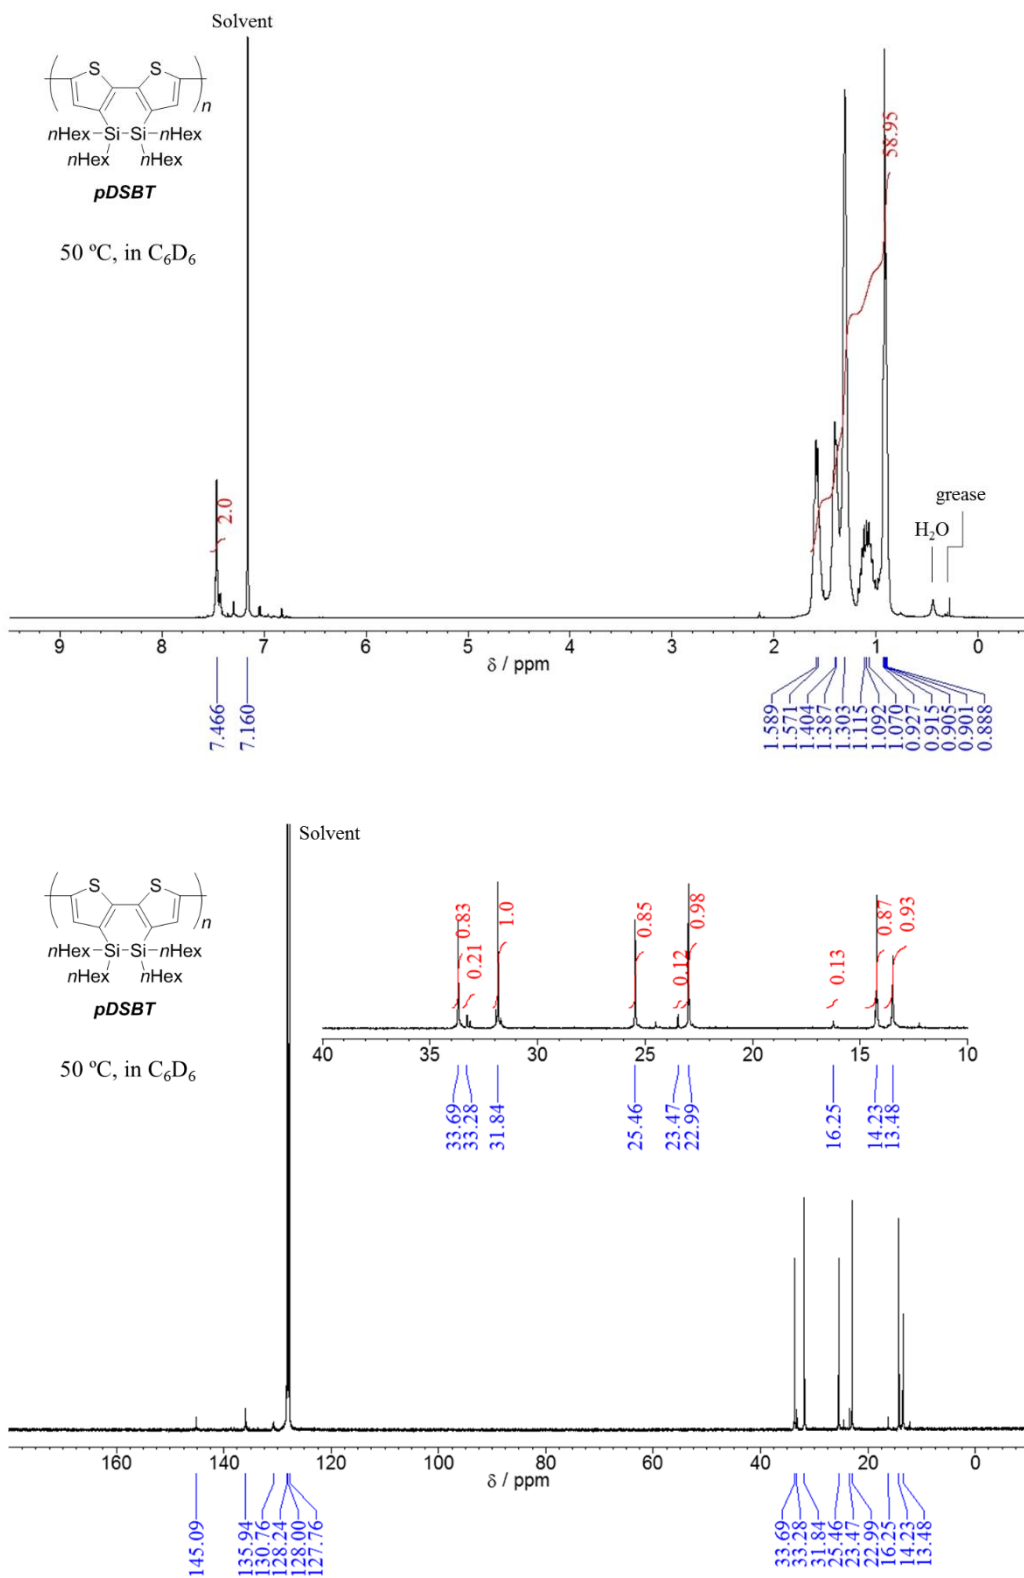

**Figure S-1.** NMR spectra of DSBT-containing polymers.



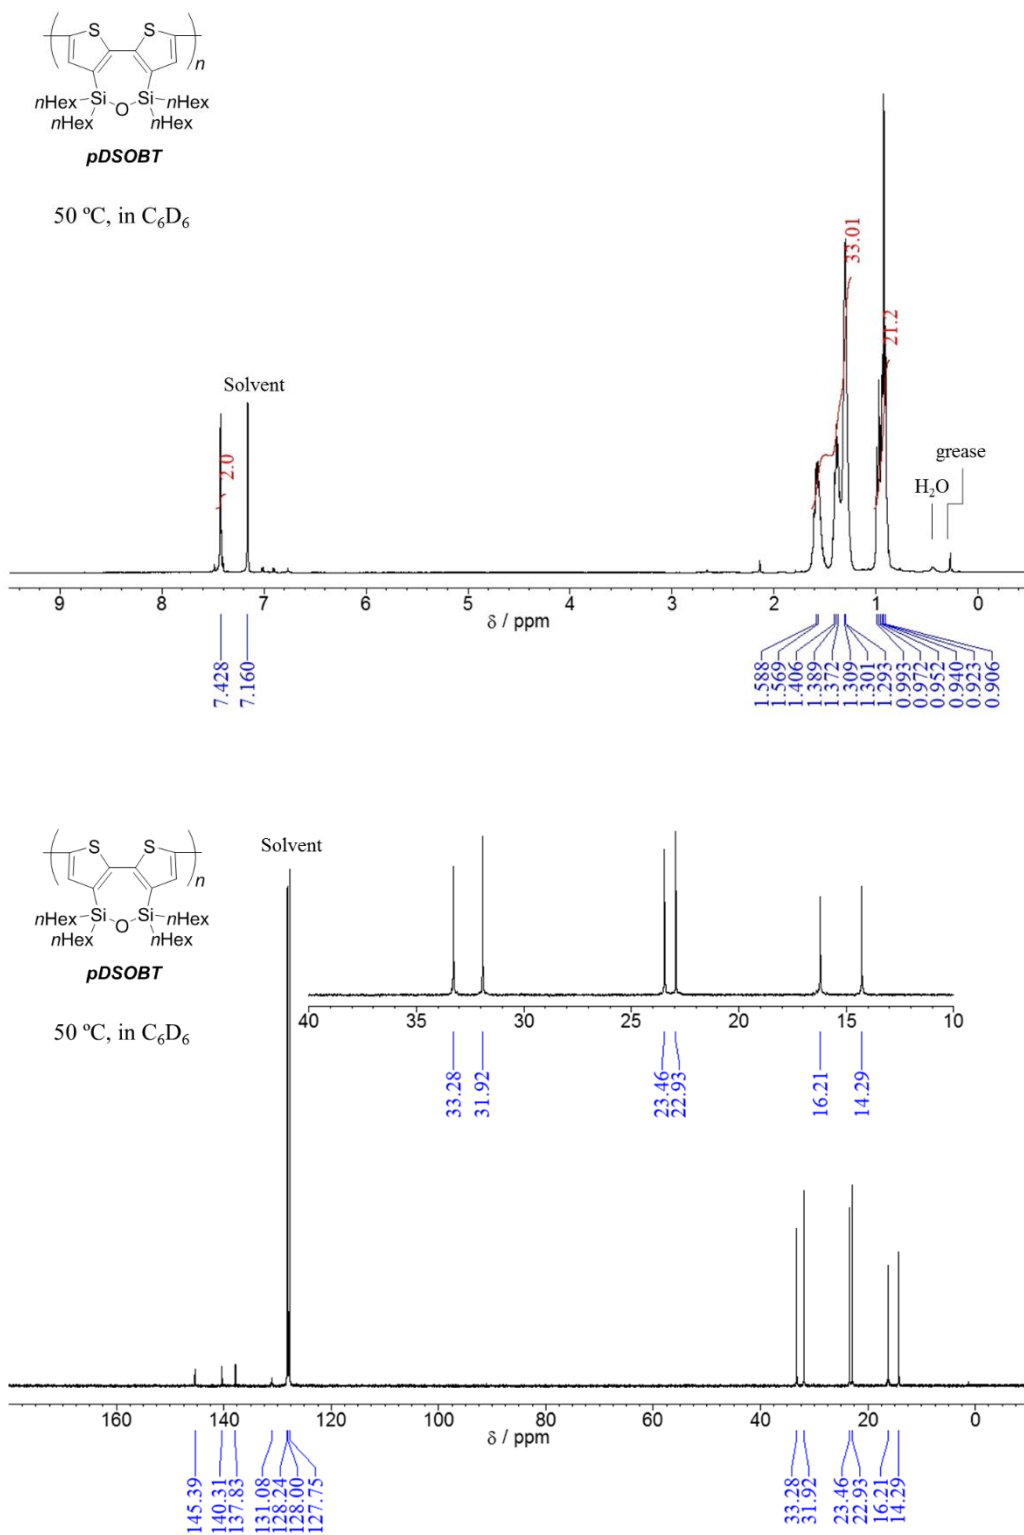

**Figure S-1.** NMR spectra of DSBT-containing polymers (continued).

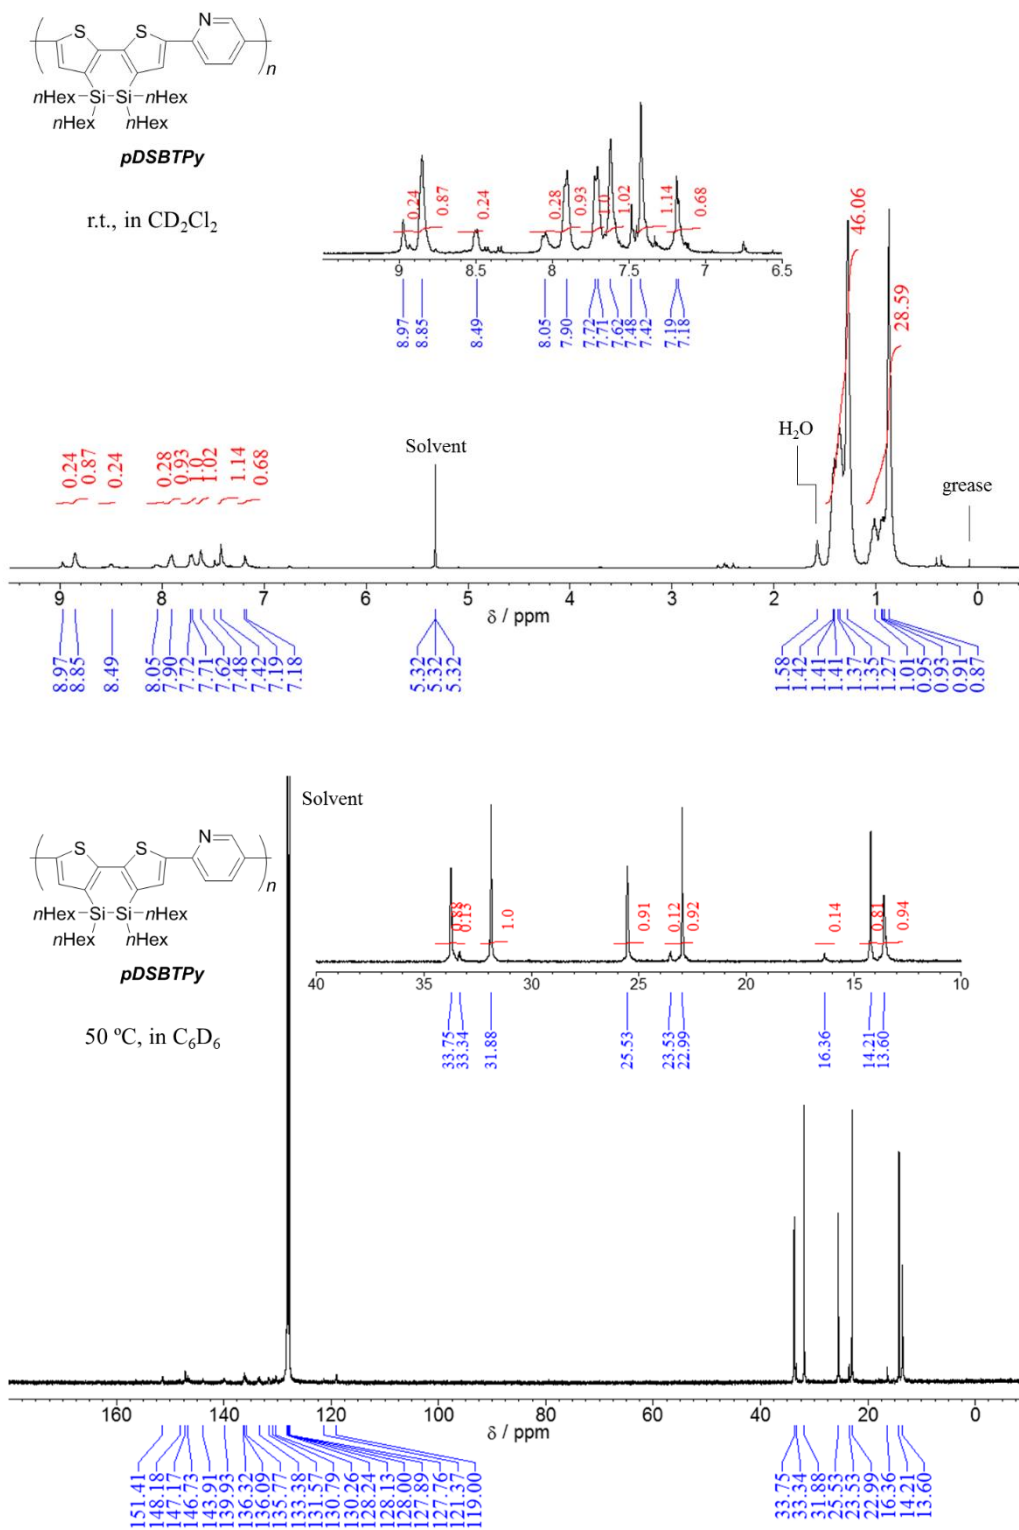

**Figure S-1.** NMR spectra of DSBT-containing polymers (continued).

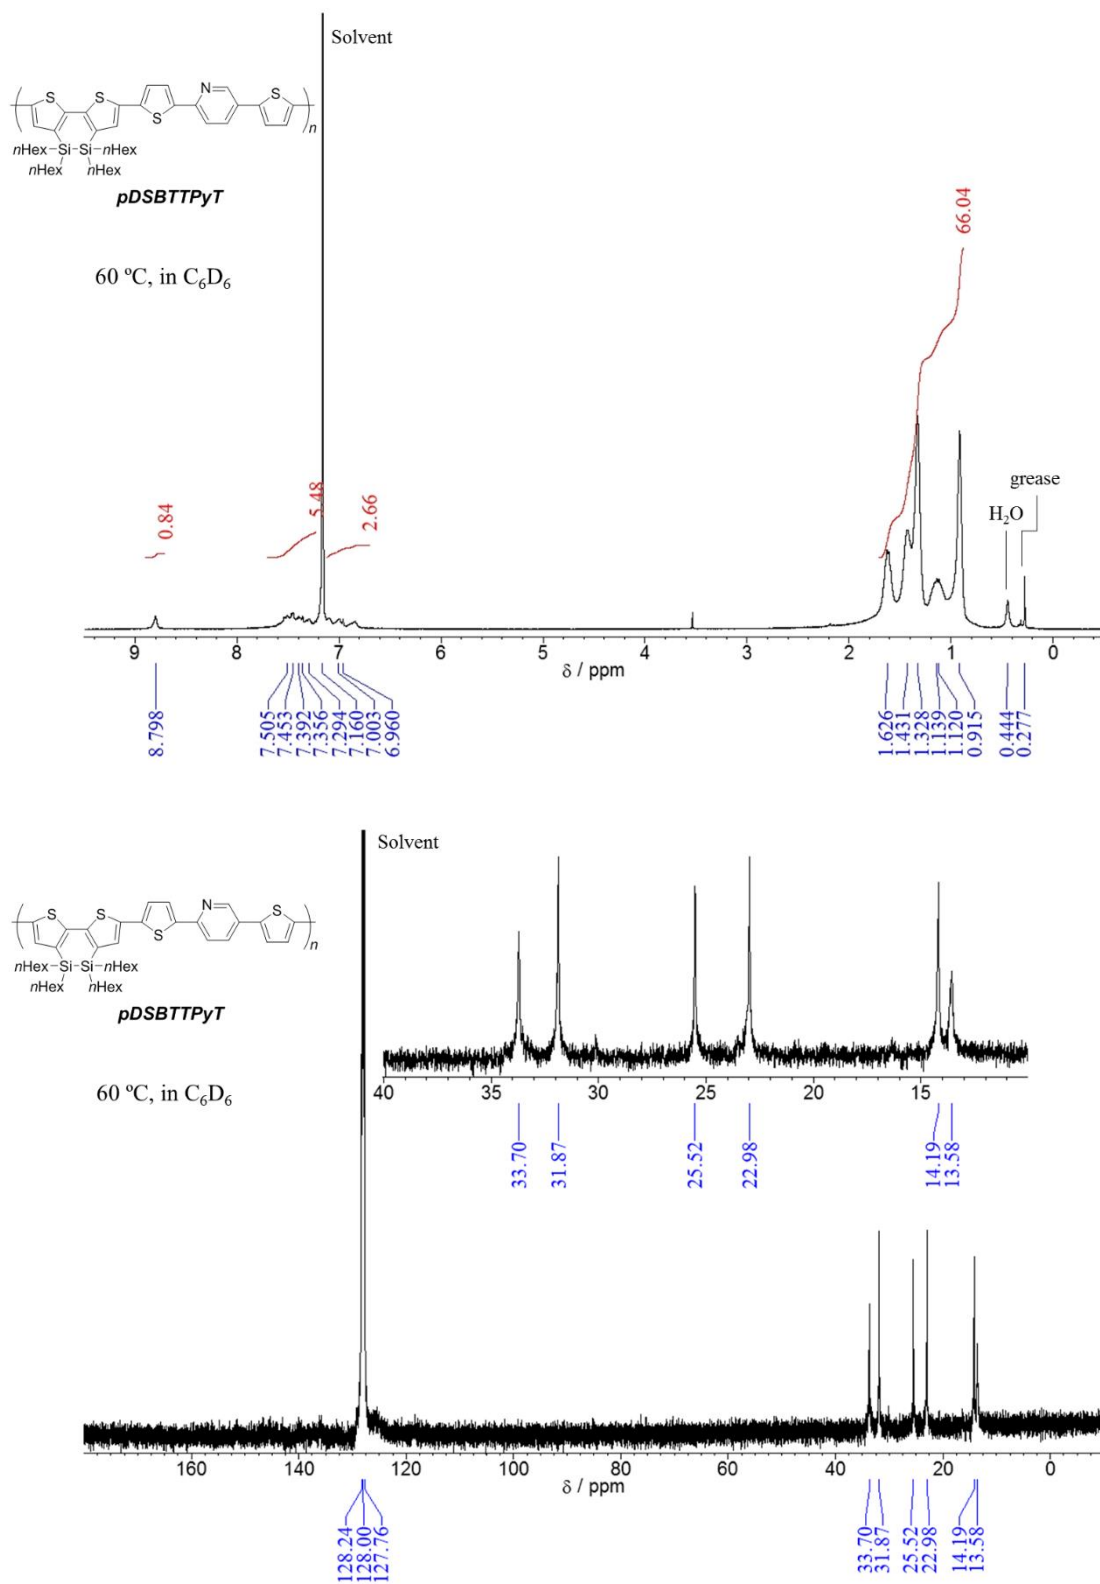

**Figure S-1.** NMR spectra of DSBT-containing polymers (continued).

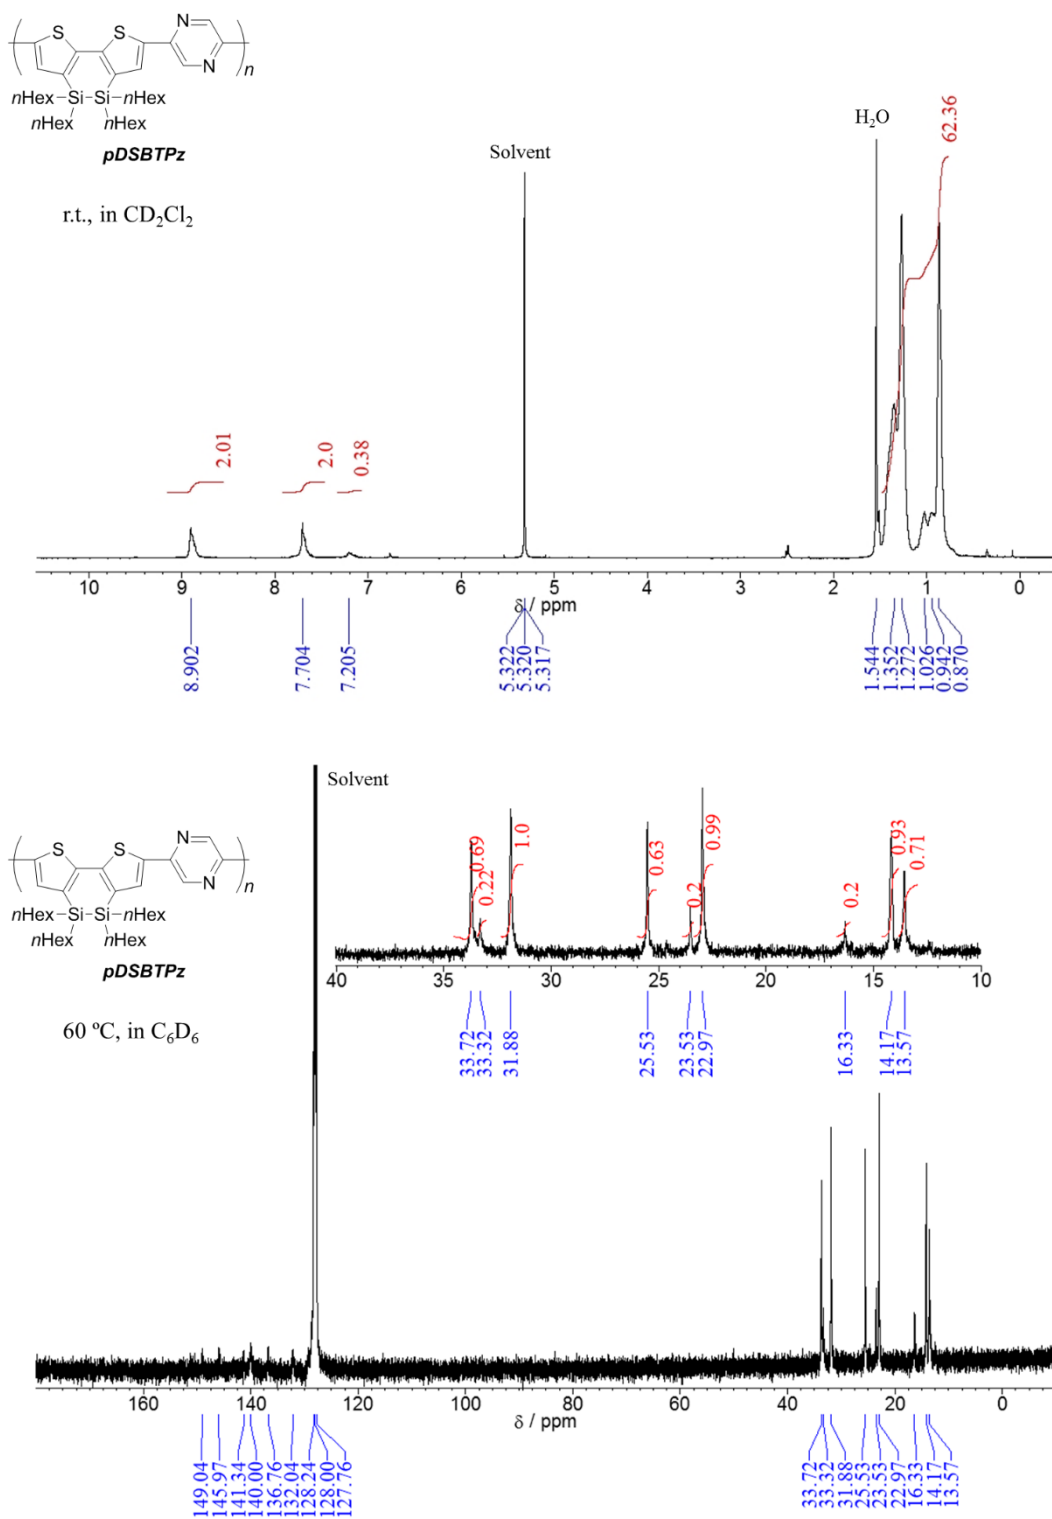

**Figure S-1.** NMR spectra of DSBT-containing polymers (continued).

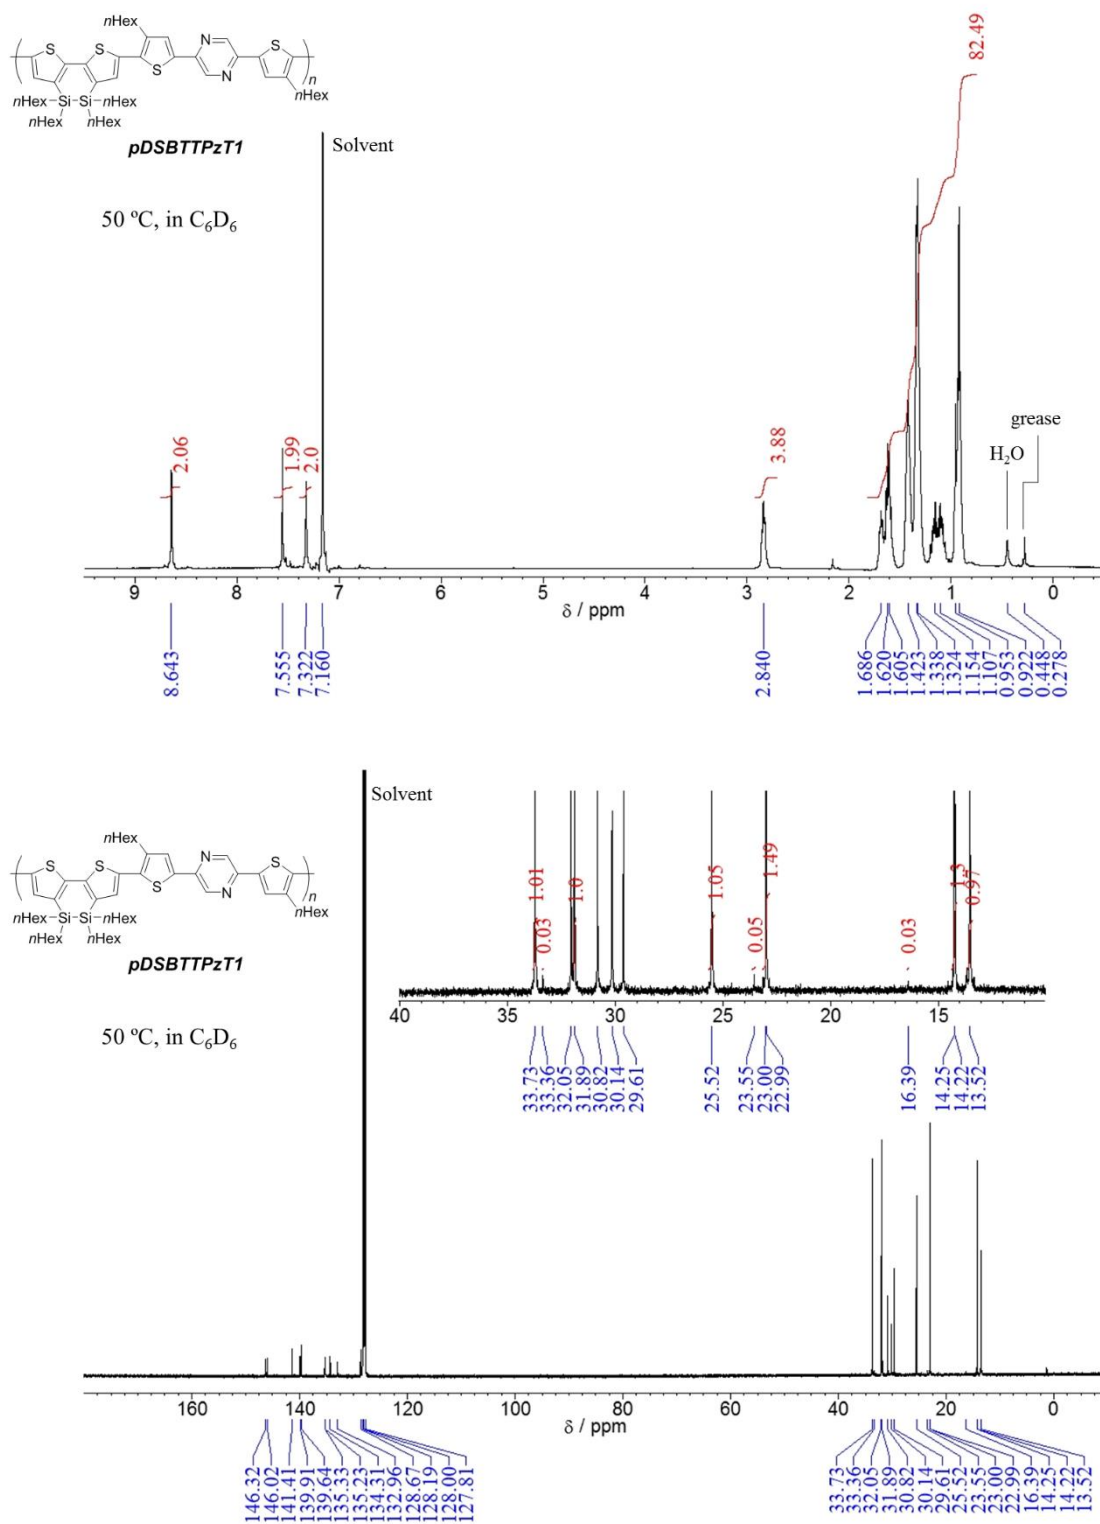

**Figure S-1.** NMR spectra of DSBT-containing polymers (continued).

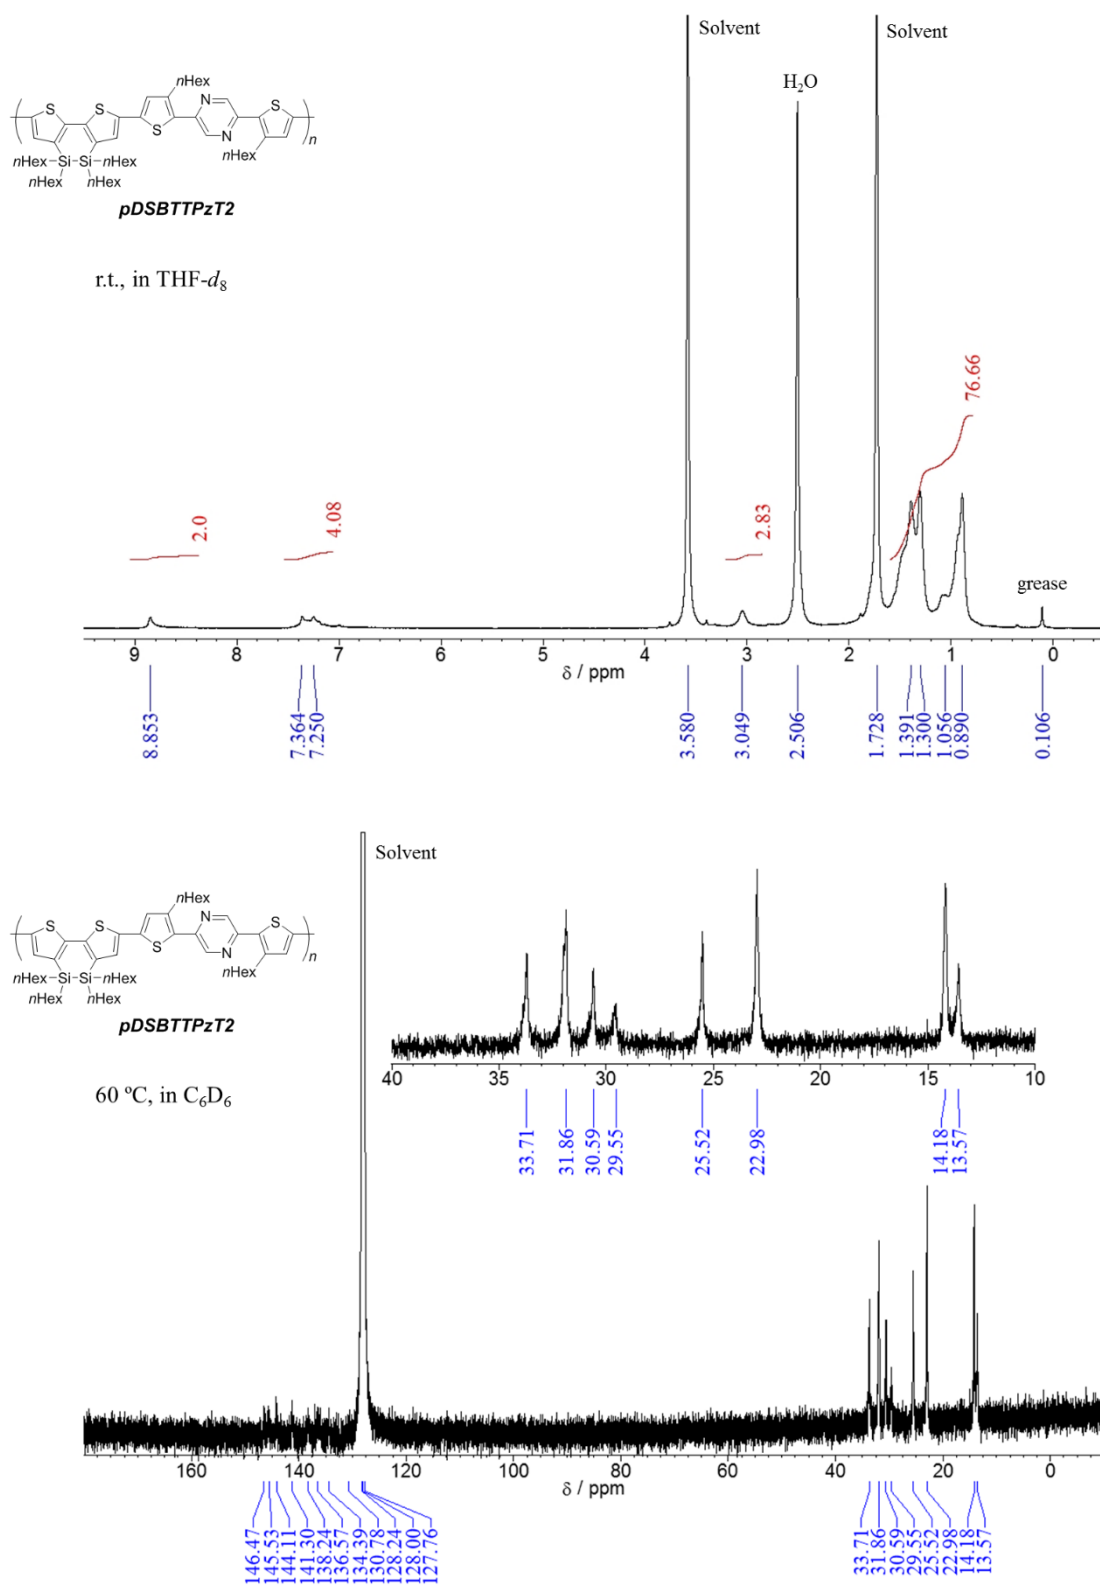

**Figure S-1.** NMR spectra of DSBT-containing polymers (continued).

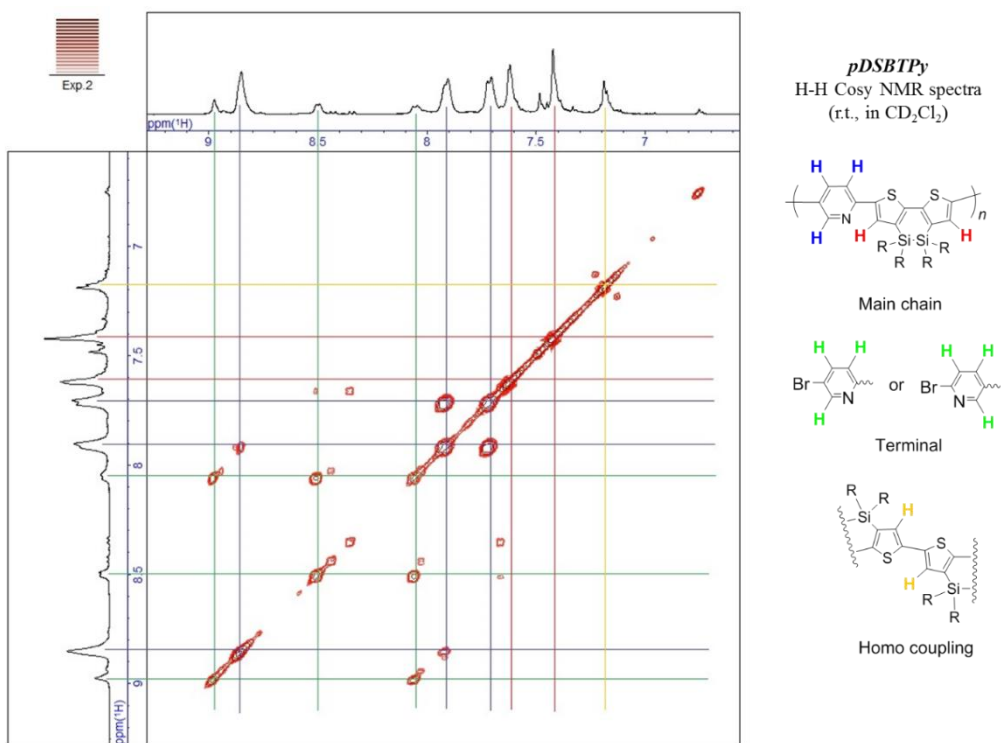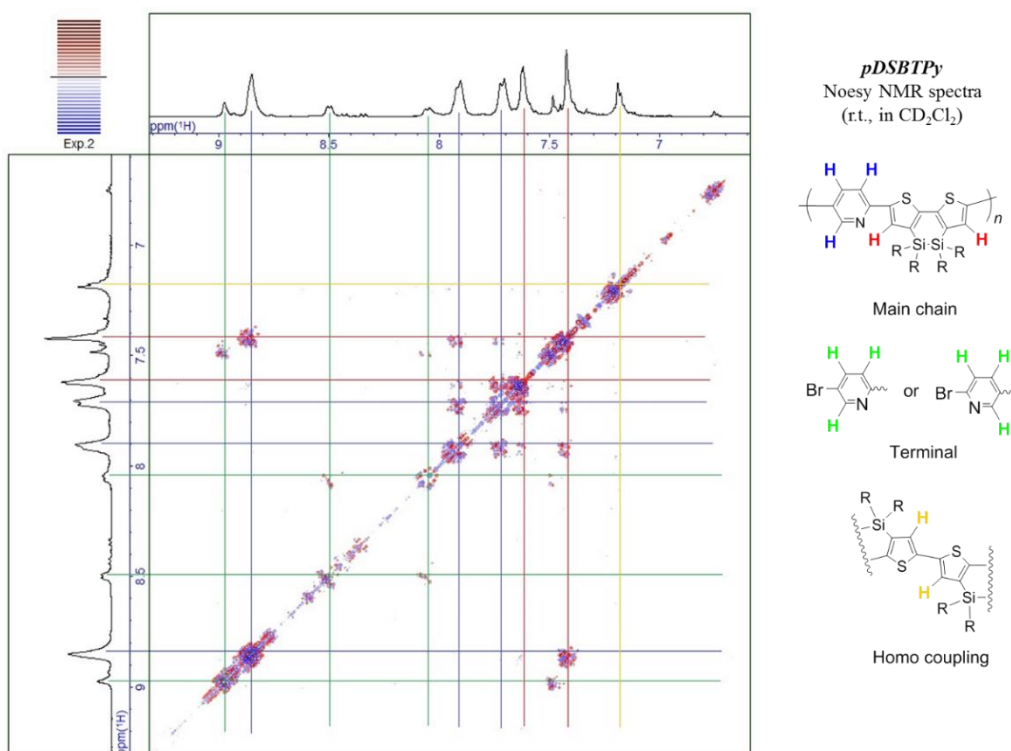

**Figure S-1.** NMR spectra of DSBT-containing polymers (continued).

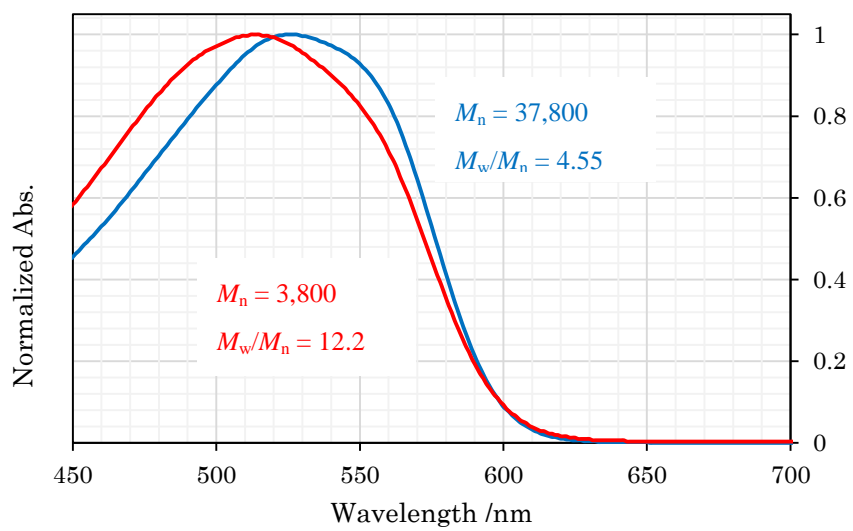

**Figure S-2.** Molecular weight-dependence of absorption spectra of **pDSBTTPzT2**.
